# Supplementary material for: Synthesis, structure and redox properties of a new ruthenium(II) complex containing the flexible tridentate ligand N,N-bis(2-pyridylmethyl)ethylamine, cis-fac-Ru(bpea)22+, and its homologue attached covalently to a polypyrrole film †
Source: Royal Society of Chemistry journal article supplement (doi:10.1039/a909511j), 2000-01-01
Supplement: a909511j.doc [file a909511j.doc]

ELECTRONIC SUPPLEMENTARY INFORMATION

MANUSCRIPT TITLE: Synthesis, structure and redox properties of a new Ru(II) complex containing the flexible tridentate *bpea* ligand, *cis-fac-*Ru(bpea)22+, and its homologous attached covalently to a polypyrrole film

*Detailed structural description of complexe* ***1****.*

The NRuN bond angles with N-atoms belonging to the same *bpea* are roughly ten degrees below 90o (ranging from 79.8 to 82.8o) whereas the *cis*-NRuN bond angles with N-atoms belonging to different *bpea* ligands are roughly ten degrees above 90o (ranging from 99.4 to 102.3o). There are two exceptions to this rule from the 12 possible *cis*-NRuN angles the N3RuN4 and N1RuN5 bond angles which are 95.36(12) and 93.93(13)o respectively. Finally all three NRuN diagonal bond angles of the hypothetical octahedron deviate from linearity by roughly 5 degrees. It is also interesting to note that the torsion angles of the pyridyl rings belonging to the same *bpea* ligand are close to the expected 60o (56.78o for rings containing N2 and N3 and 60.27o for N5 and N6). For the pyridyl rings *trans* to one another containing N3 and N5, the torsion angle is 87.49o whereas the rings which have a *cis* arrangement containing N2 and N6 that are *trans* to the aliphatic nitrogen atoms, their torsion angle is 46.30o.

*Detailed NOEs assignment of complexe* ***2****.*

H14 presents a NOE effect with H8 (d = 2.989 Å). Other protons involved in intra-ligand NOE's effects are H3A-H1A, H3B-H5, H3B-H9A(H9B), H11-H9A(H9B) and H1B-H9A(H9B); all of them agree well with the crystal structure.
